# 1 **Neighborhood deadwood and yard rewilding modulate commensal** 2 **microbiota and inflammatory signals among urbanites**

3 Marja I. Roslund<sup>1</sup>, Laura Uimonen<sup>2</sup>, Laura Kummola<sup>3</sup>, Damiano Cerrone<sup>2</sup>, Ann Ojala<sup>1</sup>, Anna  
4 Luukkonen<sup>1</sup>, Ella Holopainen<sup>1</sup>, Aku Korhonen<sup>1</sup>, Reijo Penttilä<sup>1</sup>, Martti Venäläinen<sup>1</sup>, Hanna Haveri<sup>4,5</sup>,  
5 Juho Rajaniemi<sup>2</sup>, Olli H. Laitinen<sup>3</sup>, Aki Sinkkonen<sup>1\*</sup>, and the BIWE research group<sup>6</sup>

6

7 <sup>1</sup>Natural Resources Institute Finland (Luke), Latokartanonkaari 9, 00790 Helsinki, Finland

8 <sup>2</sup>Tampere University, Faculty of Built Environment, Korkeakoulunkatu 5, Tampere, Finland

9

10 <sup>3</sup>Faculty of Medicine and Health Technology, Tampere University, Arvo Ylpön katu 34, FI-33520

11 Tampere, Finland

12 <sup>4</sup>Wellbeing Services County of Päijät-Häme, Keskussairaalankatu 7, 15850 Lahti, Finland

13 <sup>5</sup>Faculty of Medicine, Helsinki University, Haartmaninkatu 4, Helsinki, Finland

14 \*Corresponding author: aki.sinkkonen@luke.fi

15 <sup>6</sup>Damiano Cerrone, Hanna Haveri, Mishra Himansu, Ella Holopainen, Olli H. Laitinen, Jenni

16 Leppiniemi, Anna Luukkonen, Aku Korhonen, Laura Kummola, Saarajohanna Kuru, Niina Malinen,

17 Juulia Manninen, Ann Ojala, Reijo Penttilä, Juho Rajaniemi, Marja I. Roslund, Mika Saarenpää, Saija

18 Snygg, Laura Uimonen, Martti Venäläinen, Aki Sinkkonen

## 19 **Abstract**

### 20 **Background**

21 Global ecosystem deprivation is linked to reduced microbial diversity and diminished immunological  
22 resilience. Urban rewilding and decomposing plant matter have been suggested to reverse this  
23 deprivation and support human health.

### 24 **Methods**

25 We rewilded 21 urban private yards with vegetation and deadwood. Control yards (15) were analyzed  
26 for comparison. We collected microbial samples and used vegetation and deadwood inventories,  
27 landcover data and questionnaires to determine the effects of rewilding and living environment on  
28 skin and salivary microbiota, gene pathways and cytokine levels (IL-6, IL-10). Samples were  
29 collected before the rewilding in summer and three months later in autumn.

### 30 **Findings**

31 Rewilding preserved skin microbial richness in comparison to control group, including previously  
32 health-associated Alpha- and Gammaproteobacteria, despite the normal seasonal decline and less  
33 outdoor time in autumn. Deadwood abundance within 200-m radii associated directly to beta diversity  
34 of skin microbiota and Gammaproteobacterial taxonomies.

35 In saliva, deadwood was directly associated with the diversity of functional gene pathways, which in  
36 turn was negatively associated with pleiotropic IL-6 levels. Rewilding was associated with a decrease  
37 in L-histidine degradation and an increase in Mycobacteriaceae.

### 38 **Interpretation**

39 Since both yard rewilding and neighborhood deadwood preserved rich commensal microbiota and  
40 reduced pro-inflammatory signals, decomposing plant matter, not just plant richness, seems to be  
41 crucial for ecosystem services that contribute to health. Since deadwood abundance was associated

42 to reduced pro-inflammatory signals, it may be a suitable indicator of environment supporting  
43 immunological resilience.

44 Our findings provide an incentive for future strategic investments for planetary health.

45 **Funding:** Strategic Research council Finland.

## 46 **1. Introduction**

47 According to current understanding, biodiversity loss and the lack of microbial exposure in urban  
48 ecosystems is a core reason for impaired immune system regulation and the epidemic of immune-  
49 mediated diseases among urban populations.<sup>1,2</sup> Hence, there is an unmet need to rewild the urban  
50 ecosystems.<sup>3-5</sup> Urban rewilding has many benefits including increased resilience to environmental  
51 change and opportunities for urban dwellers to reconnect with nature.<sup>6</sup> Urban, private yards contribute  
52 remarkably to local ecology, biodiversity and wellbeing of the residents.<sup>7,8</sup> Microbially diverse  
53 private yards are generally assumed to provide ecosystem services that alleviate microbial deprivation  
54 and proinflammatory responses among residents,<sup>1,5,9</sup> however, this has remained untested.

55 Environmental microbial and plant community diversity influence skin and salivary microbiota.<sup>2,10-</sup>  
56 <sup>18</sup> Recent studies demonstrated how rewilding of urban daycare yards diversify children's skin  
57 microbiota and enhance immune regulation.<sup>12,13</sup> The core reason for the enhanced immune regulation  
58 seems to be the exposure to diverse microbiome *per se*; when study subjects were exposed to  
59 microbially rich sandbox sand<sup>19</sup> or growing media with high microbial diversity,<sup>15</sup> immune regulation  
60 was enhanced only in the intervention arms, not in placebo groups.

61 Studies exploring human immune system have frequently used plant diversity indices or plant species  
62 richness as an indicator of exposure to microbiological diversity.<sup>2,20-23</sup> Since a recent review  
63 summarized the results of such studies as conflicting,<sup>21</sup> differences in vegetation diversity hardly  
64 provide a complete explanation for the difference in services provided by urban and rural ecosystems.

65 Since the accumulation of decaying plant debris is recognized as an important driver of biodiversity,  
66 the importance of decomposing plant matter could provide an alternative explanation why urban  
67 ecosystems seldom support immune modulation.<sup>24</sup> Indeed, decaying wood is recognized to provide  
68 habitats for numerous fungi, saproxylic invertebrates and prokaryotes, particularly bacteria,<sup>25,26</sup> and  
69 people living in environments hosting the rich microbiota have a low probability of certain immune-  
70 mediated diseases.<sup>2,27</sup> Thus, the evaluation of ecosystem services provided by private yards should  
71 include indicators of decaying plant matter, e. g., deadwood and wood-inhabiting polypore fungi.<sup>28,29</sup>  
72 In parallel with proper measures of biodiversity, measures of immune function must be feasible and  
73 reflect environmental exposure to potential modifiers. Salivary cytokine levels reflect the  
74 environmental exposure and are a noninvasive alternative to blood cytokines as biomarkers for  
75 inflammatory responses and, neuroimmune function.<sup>30-32</sup>

76 The effect of rewilding of private yards, including alterations in garden management practices, on  
77 health-associated commensal microbiota and salivary cytokine levels has never been tested in an  
78 intervention trial. We rewilded urban private yards with diverse vegetation and decaying deadwood  
79 and plant residues. We used satellite data and vegetation, deadwood, and polypore inventories to  
80 determine the living environment of the participants and biodiversity around home yards.  
81 Questionnaires were used to evaluate the yard management practices and living habits of yard owners.  
82 Based on previous comparative studies<sup>2,14,33,34</sup> and intervention trials,<sup>12,13,15,19</sup> we hypothesized that  
83 yard rewilding diversifies health-associated skin microbiota, particularly alpha- and  
84 gammaproteobacterial communities, and that the rewilding is associated with salivary cytokine  
85 levels, gene pathways and microbiota. We also hypothesized that plant species richness and the  
86 abundance of deadwood are indicators of microbial exposure and thus associated with commensal  
87 microbiota.

88  
89  
90  
91  
92  
93  
94  
95  
96  
97  
98  
99  
100  
101  
102  
103  
104  
105  
106  
107  
108  
109  
110  
111

## 2. Materials and Methods

### 2.1. Study group

Thirty-six volunteers aged between 33–70 participated in the study (Table 1). The participants were recruited to two groups. Intervention group, hereafter called as the rewilding group, consisted of volunteers who gave a permission to diversify yard herbaceous and woody species community and were interested in following the yard management instructions described below in section 2.3. Control group continued gardening as they had done before. Study subjects were recruited from April 2022 to June 2022 in three metropolitan regions in Finland; Helsinki metropolitan region (660,000 inhabitants) lies on the south coast of Finland, Lahti (120,000 inhabitants) 100 km north, and Turku (480,000 inhabitants) 150 km west of Helsinki. All these urban housing areas face challenges in preserving green space amid built environment.

The medical exclusion criteria included immune deficiencies, a disease affecting immune response, cancer diagnosis within the last year or on-going cancer treatment. Other exclusion criteria included incompetency and living outside city area. Inclusion criteria was that the form of housing in a detached or row house. All participants provided a written, informed consent in accordance with the Declaration of Helsinki.

The study strictly followed the recommendations of the “Finnish Advisory Board on Research Integrity”, and it received an ethical approval from the HUS Committee on Medical Research Ethics (Helsinki University Hospital District). The trial has been registered in ClinicalTrials.gov (ID NCT06353035).

The participants filled out electronic questionnaires covering detailed background information, diet, nature visits, medication use, yard management practices, and details about yard activities (Appendix p 3).

## 112                    **2.2.Outcome measures and sample size**

113    A primary measure for sample size was the difference on skin gammaproteobacterial diversity  
114    between the rewilding and control group. Secondary outcome measures included differences in  
115    bacterial richness and diversity (beta and alpha) on skin and in saliva between the treatment groups.  
116    In addition, secondary outcome measures included differences in microbial functions in saliva and  
117    salivary cytokine levels (IL-6, IL-10) between the treatment groups. Another secondary objective was  
118    to assess whether there are associations between environmental factors, yard management practices,  
119    activities at the yard, salivary cytokine levels and bacterial measurements.

120    Sample size calculations for prior effect estimates are in appendix p 3.

## 121                    **2.3.Experimental design**

### 122    **Rewilding group**

123    Private yards of the rewilding group were modified with berry bushes, fruit trees, perennial yard  
124    plants, meadow transplants (1 m<sup>3</sup>), cultivation boxes (n = 3), organic mulch materials, decaying  
125    deadwood, leaf compost and organic soil with high microbial diversity in July 2022. The planting soil  
126    had high microbial richness.<sup>10,35,36</sup> It was manufactured from composted materials (wood fiber,  
127    chicken manure, bark grit, *Sphagnum* moss, biochar of vegetable origin, light growing peat;  
128    manufacturer Biolan Oy, Eura, Finland; trade names Musta Multa, Puutarhan Sammalmulta,  
129    Turpeeton Puutarhamulta). Berry bushes, fruit trees and yard plants were chosen based on high  
130    microbial diversity and richness in leaf buds (Appendix p 5). Rewilding group received herbs for  
131    cultivation boxes (Appendix p 4). One planting box per yard was left empty for annual edible plants.  
132    Decaying deadwood was transferred to yards as 1 m silver birch (*Betula pendula*) logs and wood  
133    chips (birch, aspen and oak). The logs had been inoculated with two fungi, lion's mane (*Hericium*  
134    *erinaceus*) and shiitake (*Lentinuula edodes*) two years earlier by KÄÄPÄ Biotech, Lohja, Finland.

135 Plants, cultivation boxes and decaying deadwood were placed near walkways, doors and terraces.  
136 The rewilding group received a leaf compost and were instructed to recycle organic matter and  
137 nutrients on site, e. g., to reduce raking, chop autumn leaves onto lawn and compost plant material.  
138 To improve the completeness of reporting, and ultimately the replicability of intervention, we used  
139 the Template for Intervention Description and Replication (TIDieR) checklist and guide that is an  
140 extension of the CONSORT 2010 statement.<sup>37</sup>

141 Intervention lasted 90 days from July 2022 to November 2022.

#### 142 **Control group**

143 The control group's yards were not modified. Control group received inorganic fertilizers, moss  
144 remover and ant control insecticide (Myrr®; active ingredient imidacloprid 0.03 % w/w).

#### 145 **2.4.Skin swab collection and microbial analyses**

146 Skin swabs were collected at baseline in July 2022 and three months later in early November  
147 2022. Skin swab samples were collected with a sterile cotton-wool stick wetted in 0.1% Tween® 20  
148 in 0.15 M NaCl from two parts of the dominant hand: 1) back of the hand (4 × 4 cm area), 2) forearm  
149 (5 × 5 cm area) (10 seconds wiping). Skin swabs were stored at -20 °C and within a week transferred  
150 to -80 °C.

151 DNA was extracted with DNeasy® PowerSoil® Pro Kit (Qiagen) according to manufacturer's  
152 standard protocol. PCR were performed for the V4 region within the 16S rRNA gene (three technical  
153 replicates from each sample) using 505F and 806R primers.<sup>38</sup> Negative controls (sterile water) and  
154 the ZymoBIOMICS™ Microbial Community Standard (Zymo Research Corp., Irvine, CA, United  
155 States) were included in DNA extraction and PCR to ensure the quality of the analysis. Paired-end  
156 sequencing of the amplicons (2 X 300 bp) was performed on an Illumina Miseq instrument using a  
157 v3 reagent kit.

158 Raw paired-end sequence files were processed into amplicon sequence variants (ASVs) using  
159 DADA2<sup>39</sup> with the non-redundant Silva database version 138.<sup>40</sup> To conceptualize the different  
160 sequence read depths, the data were transformed to proportions by dividing the reads for each  
161 amplicon sequence variant (ASV) in a sample by the total number of reads in that sample.<sup>41</sup>

## 162 **2.5.Saliva sample collection, metagenome shotgun sequencing and cytokine** 163 **measurements**

164 Saliva samples for microbial analyses were taken in the morning immediately after waking  
165 up. The participants held three sterile cotton swabs in mouth for 40s. Thereafter, saliva samples for  
166 cytokine analysis were collected into empty collection tubes with no additives by passive drooling  
167 before eating or brushing teeth. The samples were subsequently frozen at -20 °C and within a week  
168 transferred to -80 °C.

169 Whole metagenome shotgun sequencing was performed at FIMM – Institute for Molecular  
170 Medicine Finland as part of the Helsinki Institute of Life Science HiLIFE at the University of  
171 Helsinki. Libraries generated from total genomic DNA extracted from saliva was sequenced on the  
172 Novaseq S1/300c (Illumina) platform using the 2x150 bp paired-end read protocol. The quality of the  
173 sequencing reads was assessed with FastQC and low-quality, ambiguous sequences, adapters and  
174 contaminants were removed. Taxonomic profiling of the final read set was performed using Kraken2,<sup>42</sup>  
175 while functional profiling was carried out using HUMAnN3.<sup>43</sup>

176 For cytokine measurements, samples were thawed and IL-6 and IL-10 concentrations determined  
177 with a custom U-plex kit and MESO Quickplex SQ 120 by Meso Scale Discovery (Rockville, MD,  
178 US), according to manufacturer's instructions. Samples were used undiluted.

179

## 180 **2.6.Land cover category classification**

181 The land cover categories surrounding the dwellings of the participants were analyzed with the  
182 preclassified Coordination of Information on the Environment (CORINE) Land Cover 20-m raster.<sup>44</sup>



183 The land cover analysis was performed using the data from the year 2018. The calculations used in  
184 this study included three buffer-zones, 500, 1000, 1500-meter radii around dwelling coordinates.

## 185 **2.7. Vegetation, deadwood and polypore fungi inventories**

186 A vegetation inventory was done in each private yard and background information of the yard was  
187 recorded at baseline (June-July) (Appendix p 3). Deadwood and fruiting-bodies of wood-inhabiting  
188 polypore fungi<sup>28</sup> inventories were done within 200 m radii around the yards. Deadwood inventories  
189 encompassed all green areas and trees within public areas. We inventoried all dead trees with  $\geq 15$   
190 cm diameter at breast height (1.3 m) and other pieces of coarse woody debris with  $\geq 15$  cm basal  
191 diameter and  $\geq 1.3$  m length. For each dead tree and piece of deadwood, we recorded tree species and  
192 decay class<sup>45</sup> and occurrences of polypore fruiting-bodies. In addition, polypore fruiting-bodies were  
193 recorded from living trees with internal decay or attached dead branches. Decaying deadwood in our  
194 study represents decay class  $\geq 2$  in Renvall (1995) classification: Wood fairly hard and knife  
195 penetrates ca. 1-2 cm into the wood.<sup>45</sup>

## 196 **2.8. Statistical analyses**

197 All the statistical tests were done with R v4.3.1<sup>46</sup> and with *vegan*<sup>47</sup> and *lme4*<sup>48</sup> packages. Linear  
198 Mixed-effect Models (LMM) (function *lmer* in *lme4* package) was constructed to analyze temporal  
199 shifts in microbial measurements and correlation between microbial variables and living environment  
200 (Appendix p 4). Linear Discriminant Analysis Effect Size (LEfSe) was used to test correlations  
201 between the amount of deadwood and fungi polypore, and skin microbial taxonomies. The changes  
202 and difference between treatments in questionnaire data were determined using generalized linear  
203 models (GLM) with binomial distributions [function *glmer* in *lme4* package]. Correlations between  
204 yard characteristics and salivary cytokine levels were determined using GLM with quasipoisson  
205 distributions.

206 Skin and salivary microbial beta diversity was analyzed with Permutational Multivariate Analysis of  
207 Covariance (PERMANOVA, function *adonis2* in *vegan* package) with Bray-Curtis metric (Appendix

208 p 4).<sup>49</sup> To test the correlation between beta diversity of skin and salivary microbiota and living  
209 environment, principal coordinates analysis (PCoA) with Bray-Curtis distance was used to score the  
210 microbial measurements onto an ordination and correlation with environmental factors was assessed  
211 using function *envfit* in *vegan* package.  
212 To verify the P-value approximations, permutation tests (*lperm* in *permuco* package) were run  
213 (5,000 permutations).<sup>50</sup> All the statistical tests were considered significant when permuted or  
214 Benjamini-Hochberg adjusted p-value was < 0.05 level.

## 215 **3. Results**

216 **3.1. Characteristics of yards and study subjects were similar in both treatment groups**  
217 Thirty-six healthy volunteers aged between 33–70 participated in the study (Table 1). Major land  
218 cover category around all yards was artificial surfaces, particularly discontinuous urban fabric (Table  
219 1). This was true for all radiuses (100-2500 m). Yard characteristics were similar between treatment  
220 groups, except that the control group had approximately 16% more of manicured yard area (P = 0.05;  
221 Appendix p 5). According to the questionnaires, gardening was practiced as often, i.e., at least weekly,  
222 in both groups during the study period. The study groups did not differ in the amount of decaying  
223 deadwood and polypore species richness around homes (P > 0.1). At the baseline, yard management  
224 practices, activities in the yard, nature visits, and animal and soil contacts were similar between  
225 treatment groups (P > 0.05).

226

227

228

229

230 **Table 1. Characteristics of the study participants.** Age and land cover categories around home  
 231 yards with radius 500m are presented as mean  $\pm$  standard deviation. The land cover categories  
 232 surrounding the private yards were analyzed with the preclassified Coordination of Information on  
 233 the Environment (CORINE).

|                                            | <b>Intervention</b> | <b>Control</b> | <b>Total</b> |
|--------------------------------------------|---------------------|----------------|--------------|
| <b>Gender, male</b>                        | 5                   | 4              | 9            |
| <b>Gender, female</b>                      | 16                  | 11             | 27           |
| <b>Gender, non-binary</b>                  | 0                   | 0              | 0            |
| <b>Age</b>                                 | 46 $\pm$ 11         | 52 $\pm$ 13    | 48 $\pm$ 12  |
| <b>Pet ownership</b>                       | 12                  | 3              | 15           |
| <b>Land cover categories 500-m radius:</b> |                     |                |              |
| <b>Artificial surfaces%:</b>               | 94 $\pm$ 16         | 95 $\pm$ 7     | 95 $\pm$ 13  |
| - <b>Discountinuous urban fabric%</b>      | 59 $\pm$ 21         | 70 $\pm$ 16    | 64 $\pm$ 20  |
| - <b>Industrial or commercial units</b>    | 26 $\pm$ 20         | 20 $\pm$ 21    | 24 $\pm$ 20  |
| - <b>Green urban areas%</b>                | 9 $\pm$ 16          | 3 $\pm$ 10     | 6 $\pm$ 14   |
| <b>Forests%</b>                            | 2 $\pm$ 8           | 1 $\pm$ 5      | 2 $\pm$ 6    |
| <b>Agricultural areas%</b>                 | 3 $\pm$ 13          | 1 $\pm$ 4      | 3 $\pm$ 10   |

234

235 During the study period, rewilding group had planted more often as compared to the control group  
 236 (GLM: P = 0.002, R2 = 0.22; Appendix p 6). None of the participants had used plant pesticides.  
 237 Insecticides were used rarely or never. Rewilding group did not use inorganic fertilizers during the  
 238 study period, whereas among control group these were used 1-3 times in a month or more rarely.  
 239 Time spent at the home yards decreased in fall in both the intervention and control groups (Appendix  
 240 p 6-7).

241

### 242 **3.2. Neighborhood deadwood and land cover were associated with commensal** 243 **microbiota**

244 LEfSe analysis (Figure 1) and LMM models both identified Proteobacteria, particularly  
 245 gammaproteobacterial order Burkholderiales and family Neisseriaceae, on the forearm to be  
 246 associated with high polypore species richness and the amount of decaying deadwood (P < 0.001;  
 247 Appendix p 8). In addition, skin bacterial beta diversity was associated with deadwood both at the

248 baseline (forearm  $P = 0.024$ ,  $R^2 = 0.22$ ; Figure 2B) and in the fall (back of the hand  $P = 0.035$ ,  $R^2 =$   
 249  $0.30$ ; Figure 2A) (Appendix p 9).

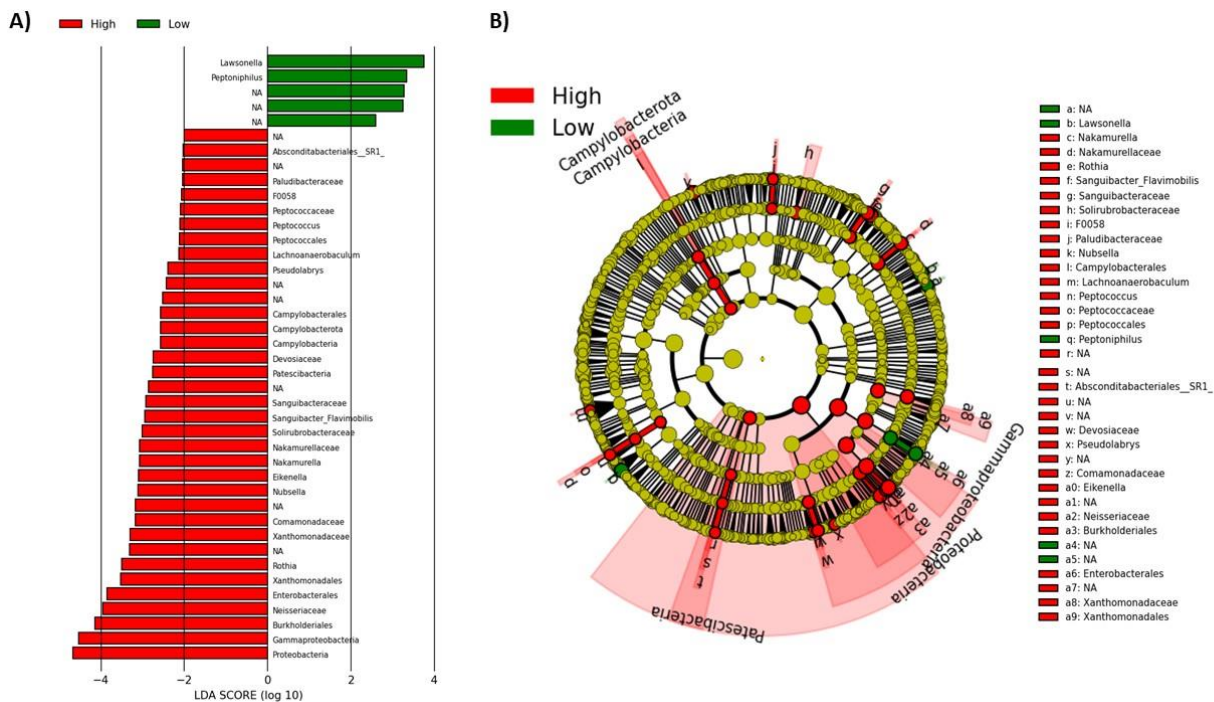

250

251 **Figure 1: Linear discriminant analysis effect size (LEfSe) analysis of skin bacterial abundance**  
 252 **on the arm of yard inhabitants. The study subjects were split to two groups based on the amount**  
 253 **of neighborhood deadwood: High (red) > 10 and low (green) < 10 deadwood logs. A) Linear**  
 254 **discriminant analysis (LDA) score identified the size of differentiation with a threshold value of 2.0.**  
 255 **B) The cladogram of skin microbial communities on the arm. Unclassified bacteria = NA.**

256

257 In saliva, Simpson diversity index of functional gene pathways correlated positively with the amount  
 258 of neighborhood deadwood, but only at baseline (LMM:  $P = 0.04$ ,  $R^2 = 0.12$ ). City was a significant  
 259 confounding factor in LMM models because Helsinki had more deadwood and higher polypore  
 260 species richness compared to Kaarina ( $P < 0.04$ ) and Lahti ( $P < 0.0001$ ).

261

262 At the baseline, beta diversity of functional gene pathways in saliva was associated with green urban  
 263 areas at 100-m radius ( $P = 0.019$ ,  $R^2 = 0.21$ ; Figure 2C). Beta diversity of skin bacterial taxa on the  
 264 back of the hand was associated with forests ( $P = 0.007$ ,  $R^2 = 0.31$ ), while on the forearm it was

265 associated with green urban areas at 500-m radius ( $P = 0.04$ ,  $R^2 = 0.19$ ) (Figure 2A and B). In fall  
266 these associations were not observed ( $P \geq 0.069$ ).

267

### 268 **3.3. Yard management practices and yard characteristics influenced the abundance** 269 **profile of salivary and skin microbiota**

270 At the baseline, the coverage of paved surfaces ( $P = 0.027$ ,  $R^2 = 0.12$ ) and meadows ( $P = 0.03$ ,  $R^2 =$   
271  $0.23$ ) at the yard were associated with the abundance profile of salivary microbial species (Figure  
272 2D). In fall, the associations were not observed anymore, but urban fabric around yards with 100-  
273 radius ( $P = 0.012$ ,  $R^2 = 0.38$ ; Figure 2D) and raking frequency ( $P = 0.047$ ,  $R^2 = 0.24$ ; Figure 2D)  
274 influenced the abundance profile of salivary microbial species to the same direction (Appendix p 16).  
275 Control study subjects raked more often their yards in fall compared to the baseline ( $P = 0.02$ ,  $R^2 =$   
276  $0.33$ ; Appndix p 7).

277 The abundance profile of forearm skin bacteria depended on manicured yard area% ( $P = 0.042$ ,  $R^2 =$   
278  $0.18$ ; Figure 2B) and lawn% ( $P = 0.022$ ,  $R^2 = 0.25$ ; Figure 2B) to the opposite direction as unkept  
279 yard area% ( $P = 0.042$ ,  $R^2 = 0.18$ ; Appendix p 16). In fall, the frequencies of berry and fruit picking  
280 ( $P = 0.014$ ), composting garden residues ( $P = 0.044$ ) and cutting plants ( $P = 0.039$ ) influenced skin  
281 bacterial community (back of hand) (Figure 2A; Appendix p 16). Time spent at the yard influenced  
282 skin bacteria composition in fall (Figures 2A and B).

283 Confounding factors including age, gender, BMI, and diet were not associated with salivary microbial  
284 profiles (Appendix p 10). Age (forearm) and junk food consumption (back of hand) were associated  
285 with skin bacterial profile (Appendix p 10).

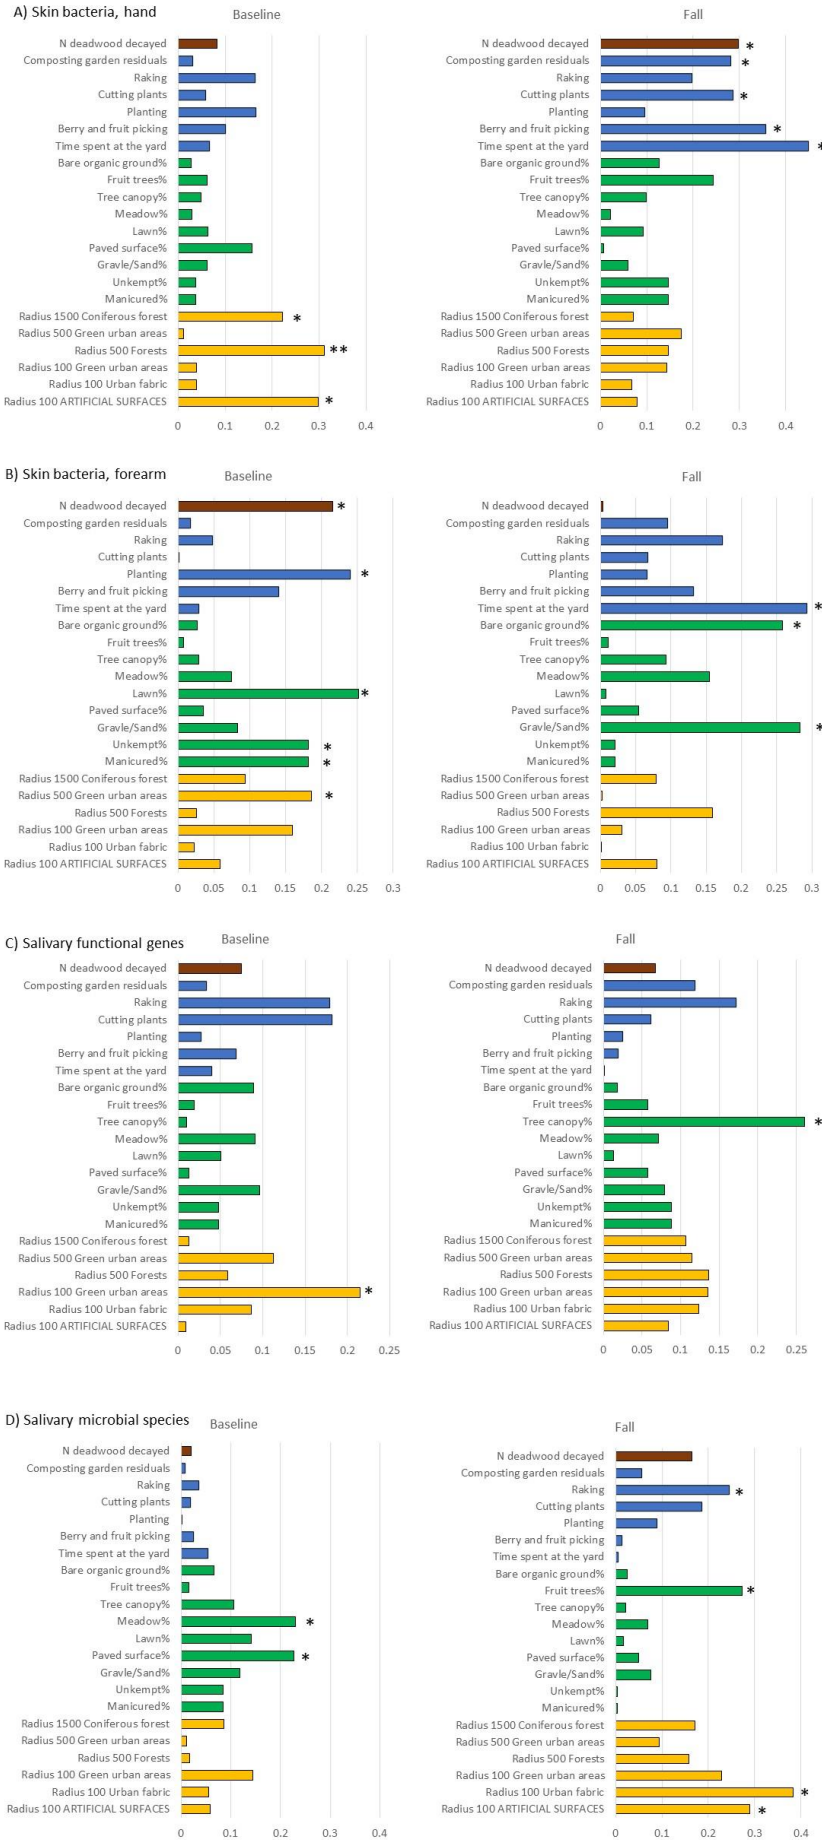

287 **Figure 2. Significance and explained variance of 22 environmental variables modelled by**  
288 **EnvFit.** Horizontal bars show the amount of variance (R<sup>2</sup>) explained by each environmental variable.  
289 A) skin bacteria on the back of the hand and B) on forearm are based on 16S rRNA sequencing data  
290 at ASV level, and C) salivary functional gene pathways and D) salivary microbial species are based  
291 on metagenomic shotgun sequencing data at baseline and in fall (day 90). Environmental variables  
292 are colored based on metadata group: brown = deadwood, blue = garden management practices, green  
293 = yard characteristics (percentage of yard area), yellow = land cover categories around home. \* P <  
294 0.05, \*\* P < 0.01.

295

### 296 **3.4. Rewilding preserved skin bacterial diversity and richness to fall**

297 Skin bacterial richness or diversity did not decrease in the rewilding group during the study period (P  
298 > 0.5), while the alphaproteobacterial Simpson diversity decreased among control group on the  
299 forearm (P = 0.008, R<sup>2</sup> = 0.19) (Figure 3; Appendix p 12). Beta diversity of skin bacteria on the back  
300 of the hand shifted in the control group during the study period, while no changes were observed in  
301 the rewilding group (Figure 4). Skin alphaproteobacterial diversity decreased from summer to fall  
302 also when both groups were analyzed together (Hand: P = 0.003, forearm: P = 0.004; Appendix p 12-  
303 13).



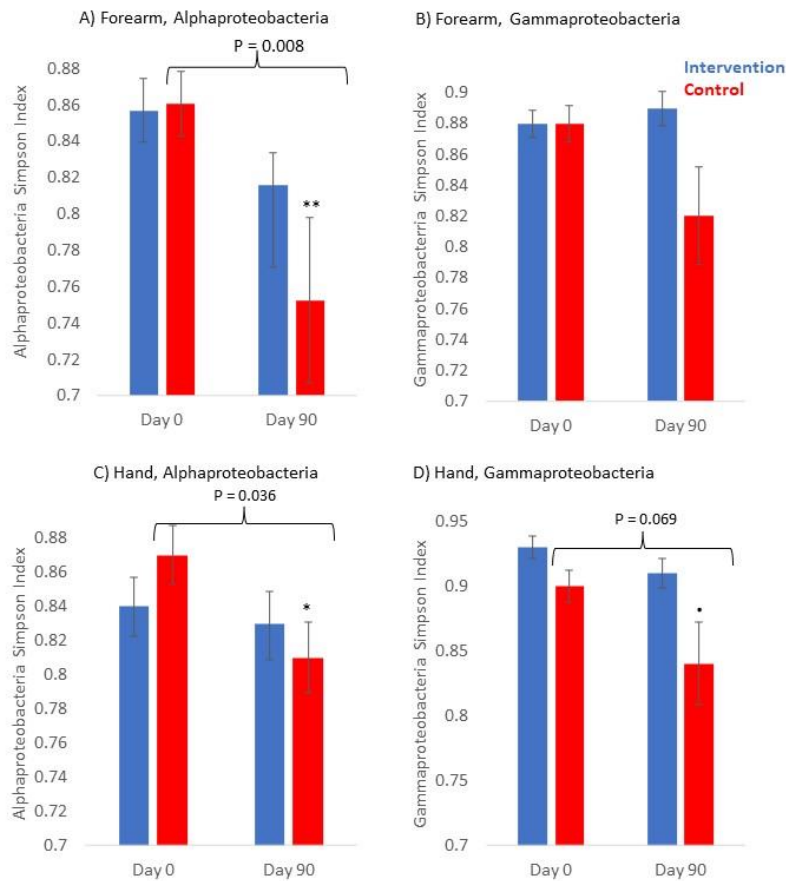

304

305 **Figure 3. Skin Simpson diversity index of A) Alphaproteobacteria and B)**  
306 **Gammaproteobacteria on forearm, and C) Alphaproteobacteria and D) Gammaproteobacteria**  
307 **on back of the hand between intervention and control groups at baseline (Day 0) and in fall**  
308 **(Day 90). Decrease in control:  $\cdot P = 0.07$ ,  $*P = 0.04$ ,  $**P = 0.008$**



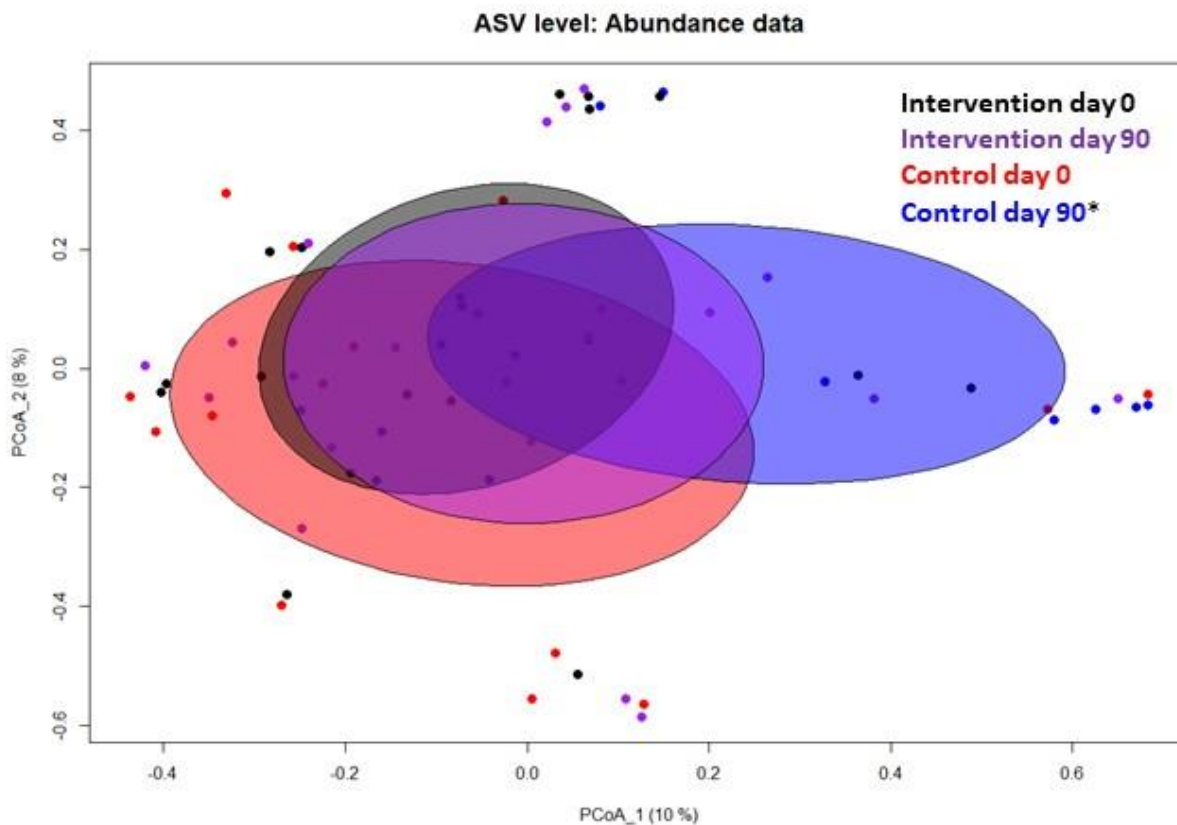

309

310 **Figure 4. Beta diversity of skin bacteria on the back of the hand.** \*Composition of skin bacteria  
311 shifted among control subjects  $P = 0.046$  (Bray-Curtis distance in PERMANOVA).

312

313 At the baseline, yard plant richness was directly associated with skin alphaproteobacterial diversity  
314 on the back of the hand ( $P = 0.007$ ; Table 2A) and on the forearm ( $P = 0.008$ ; Appendix p 17). In the  
315 fall, plant richness was directly associated with total bacterial richness and diversity on the back of  
316 the hand ( $P \leq 0.01$ ; Table 2A) and the richness on the forearm ( $P = 0.05$ ) (Appendix p 17). When  
317 treatment groups were analyzed separately, the direct association between plant richness and skin  
318 total bacterial richness on the back of the hand ( $P = 0.006$ ) and diversity ( $P = 0.004$ ) were observed  
319 only within the rewilding group in the fall (Table 2B; Appendix p 17). Treatments did not differ in  
320 yard plant richness at the baseline of in fall (Appendix p 5).

321 **Table 2. Linear mixed model (LMM) results for correlation of yard plant richness with skin**  
322 **bacterial richness and diversity indices on the back of the hand.** Analyses were done with A) all

323 study subjects, and **B**) intervention study subjects, and **C**) control study subjects at baseline and three  
 324 months later in fall. LMM statistics are reported as t value, probability p value, Benajmini-Hochberg  
 325 adjusted p value and R squared (R2).

| A) All study subjects        | Baseline |              |              |      | Fall    |              |              |      |
|------------------------------|----------|--------------|--------------|------|---------|--------------|--------------|------|
|                              | t value  | p value      | p adjust     | R2   | t value | p value      | p adjust     | R2   |
| Total richness               | 1.42     | 0.154        | 0.277        | 0.07 | 2.59    | <b>0.010</b> | <b>0.030</b> | 0.18 |
| Gammaproteobacteria richness | 0.10     | 0.920        | 0.920        | 0.00 | 0.51    | 0.611        | 0.611        | 0.01 |
| Alphaproteobacteria richness | 1.94     | 0.053        | 0.119        | 0.20 | 0.86    | 0.392        | 0.588        | 0.02 |
| Total Shannon                | 0.82     | 0.410        | 0.553        | 0.03 | 3.11    | <b>0.002</b> | <b>0.018</b> | 0.24 |
| Gammaproteobacteria Shannon  | 0.40     | 0.686        | 0.772        | 0.00 | 0.73    | 0.465        | 0.598        | 0.02 |
| Alphaproteobacteria Shannon  | 2.69     | <b>0.007</b> | <b>0.032</b> | 0.24 | 1.36    | 0.174        | 0.313        | 0.06 |
| Total Simpson                | 2.21     | <b>0.027</b> | 0.081        | 0.17 | 2.67    | <b>0.008</b> | <b>0.030</b> | 0.22 |
| Gammaproteobacteria Simpson  | 0.79     | 0.430        | 0.553        | 0.04 | 0.51    | 0.610        | 0.611        | 0.01 |
| Alphaproteobacteria Simpson  | 2.71     | <b>0.007</b> | <b>0.032</b> | 0.20 | 2.00    | <b>0.046</b> | 0.104        | 0.12 |
| B) Intervention              | Baseline |              |              |      | Fall    |              |              |      |
|                              | t value  | p value      | p adjust     | R2   | t value | p value      | p adjust     | R2   |
| Total richness               | 1.84     | 0.081        | 0.223        | 0.15 | 3.10    | <b>0.006</b> | <b>0.027</b> | 0.34 |
| Gammaproteobacteria richness | 0.94     | 0.361        | 0.370        | 0.04 | 0.27    | 0.789        | 0.789        | 0.00 |
| Alphaproteobacteria richness | 0.92     | 0.370        | 0.370        | 0.04 | 0.77    | 0.450        | 0.537        | 0.03 |
| Total Shannon                | 1.28     | 0.217        | 0.279        | 0.08 | 3.32    | <b>0.004</b> | <b>0.027</b> | 0.37 |
| Gammaproteobacteria Shannon  | 1.35     | 0.193        | 0.279        | 0.09 | 0.73    | 0.477        | 0.537        | 0.03 |
| Alphaproteobacteria Shannon  | 1.52     | 0.146        | 0.263        | 0.11 | 1.09    | 0.291        | 0.437        | 0.06 |
| Total Simpson                | 1.97     | 0.064        | 0.223        | 0.17 | 2.62    | <b>0.017</b> | <b>0.051</b> | 0.26 |
| Gammaproteobacteria Simpson  | 1.93     | 0.069        | 0.223        | 0.16 | 1.33    | 0.200        | 0.360        | 0.08 |
| Alphaproteobacteria Simpson  | 1.74     | 0.099        | 0.223        | 0.14 | 1.41    | 0.175        | 0.360        | 0.09 |
| C) Control                   | Baseline |              |              |      | Fall    |              |              |      |
|                              | t value  | p value      | p adjust     | R2   | t value | p value      | p adjust     | R2   |
| Total richness               | -0.24    | 0.813        | 0.838        | 0.00 | 0.09    | 0.933        | 0.992        | 0.00 |
| Gammaproteobacteria richness | -1.19    | 0.255        | 0.540        | 0.10 | -0.51   | 0.620        | 0.872        | 0.03 |
| Alphaproteobacteria richness | 1.18     | 0.257        | 0.540        | 0.10 | 0.48    | 0.639        | 0.872        | 0.03 |
| Total Shannon                | -0.21    | 0.838        | 0.838        | 0.00 | 0.43    | 0.678        | 0.872        | 0.02 |
| Gammaproteobacteria Shannon  | -1.08    | 0.300        | 0.540        | 0.08 | -0.70   | 0.500        | 0.872        | 0.05 |
| Alphaproteobacteria Shannon  | 1.77     | 0.099        | 0.446        | 0.19 | 0.75    | 0.474        | 0.872        | 0.06 |
| Total Simpson                | 0.36     | 0.725        | 0.838        | 0.01 | -0.01   | 0.992        | 0.992        | 0.00 |
| Gammaproteobacteria Simpson  | -0.93    | 0.367        | 0.551        | 0.06 | -0.91   | 0.386        | 0.872        | 0.08 |
| Alphaproteobacteria Simpson  | 2.04     | 0.062        | 0.446        | 0.24 | 1.32    | 0.219        | 0.872        | 0.16 |

326

327

328 At the baseline, yard sport activities were directly associated with skin alphaproteobacterial richness  
 329 (GLM: P = 0.005, R2 = 0.25) and Shannon diversity (GLM: P = 0.007, R2 = 0.24). When treatment  
 330 groups were separate, berry and fruit picking was directly associated with skin bacterial richness (P

331 = 0.01,  $R^2 = 0.42$ ) and Shannon diversity ( $P = 0.03$ ,  $R^2 = 0.23$ ) in the rewilding group. In the control  
332 group, the frequency of nature visits increased skin gammaproteobacterial diversity in the fall ( $P =$   
333  $0.002$ ,  $R^2 = 0.54$ ).

### 334 **3.5. Rewilding shifted salivary microbiota and functional gene pathways**

335 Among rewilding group, salivary microbiomes were enriched with the family Mycobacteriaceae ( $P$   
336  $= 0.04$ ;  $R^2 = 0.09$ ) and genus *Leuconostoc* (Lactobacillaceae) ( $P = 0.02$ ;  $R^2 = 0.12$ ; Appendix p 14).  
337 Among control subjects, the relative abundance of these taxonomies showed a decreasing trend  
338 (Appendix p 14). The change difference between treatments was significant (LMM:  $P = 0.007$ ,  $R^2 =$   
339  $0.20$  and  $P = 0.018$ ,  $R^2 = 0.15$ , respectively; Appendix p 14). Functional gene pathway related to L-  
340 histidine degradation I was decreased during the study period in the rewilding group, while it  
341 increased in the control group (Change difference between treatments in LMM:  $P = 0.006$ ,  $R^2 = 0.13$ ;  
342 Appendix p 14).

343

### 344 **3.6. IL-6 was associated negatively with salivary microbial and functional richness**

345 In the fall, total microbial, alpha- and gammaproteobacterial richness and functional richness and  
346 diversity of gene pathways in saliva were negatively associated with salivary IL-6 (Table 3; Appendix  
347 p 18). Picking of berries and fruits were directly associated with salivary IL-10 ( $P = 0.002$ ) and IL-6  
348 ( $P = 0.006$ ) (Appendix p 15) in the rewilding group but not in the control group or at the baseline ( $P$   
349  $> 0.1$ ; Appendix p 15). Fruit trees and tree canopy percentage were directly associated with salivary  
350 IL-10 (fruit trees%  $P = 0.015$ ) and IL-6 (fruit trees%  $P < 0.001$  and tree canopy%  $P = 0.002$ ) at the  
351 baseline (Appendix p 15). Potential confounding factors (age, gender, BMI and diet) were not  
352 associated with immune markers (Appendix p 10-11).

353

354

355 **Table 3. Linear mixed model (LMM) results in fall between salivary IL-6 and microbial**  
 356 **richness and diversity indexes.** LMM statistics are reported as t value, probability p value, permuted  
 357 p value (5,000 permutaitons), Benjamini-Hochberg adjusted p value and fixed R squared (R2) for the  
 358 model.

|                                    | <b>t value</b> | <b>p value</b> | <b>permuted p value</b> | <b>p adjust</b> | <b>R2</b> |
|------------------------------------|----------------|----------------|-------------------------|-----------------|-----------|
| Total richness                     | -3.076         | <b>0.005</b>   | <b>0.003</b>            | <b>0.017</b>    | 0.273     |
| Phyla Proteobacteria richness      | -2.750         | <b>0.010</b>   | <b>0.004</b>            | <b>0.017</b>    | 0.251     |
| Class Gammaproteobacteria richness | -2.501         | <b>0.019</b>   | <b>0.007</b>            | <b>0.017</b>    | 0.229     |
| Class Alphaproteobacteria richness | -3.225         | <b>0.003</b>   | <b>0.003</b>            | <b>0.017</b>    | 0.278     |
| functional richness                | -2.910         | <b>0.007</b>   | <b>0.005</b>            | <b>0.017</b>    | 0.255     |
| Total Shannon                      | -2.223         | <b>0.035</b>   | <b>0.032</b>            | 0.054           | 0.158     |
| Phyla Proteobacteria Shannon       | -0.679         | 0.503          | 0.515                   | 0.594           | 0.016     |
| Class Gammaproteobacteria Shannon  | -0.923         | 0.364          | 0.375                   | 0.468           | 0.030     |
| Class Alphaproteobacteria Shannon  | -2.797         | <b>0.009</b>   | <b>0.009</b>            | <b>0.020</b>    | 0.246     |
| Functional Shannon                 | -2.894         | <b>0.007</b>   | <b>0.006</b>            | <b>0.017</b>    | 0.245     |
| Total Simpson                      | -0.993         | 0.330          | 0.318                   | 0.433           | 0.036     |
| Phyla Proteobacteria Simpson       | 0.147          | 0.884          | 0.891                   | 0.891           | 0.001     |
| Class Gammaproteobacteria Simpson  | -0.559         | 0.581          | 0.612                   | 0.656           | 0.011     |
| Class Alphaproteobacteria Simpson  | -1.232         | 0.228          | 0.147                   | 0.220           | 0.057     |
| Functional Simpson                 | -2.474         | <b>0.020</b>   | <b>0.013</b>            | <b>0.025</b>    | 0.210     |

359

## 360 4. Discussion

### 361 4.1. Yard rewilding promotes health-promoting ecosystem services

362 Our study is the first to show how rewilding of urban private yards with vegetation and decaying  
 363 deadwood prevents the microbial diversity loss on human skin and plausibly modifies salivary  
 364 microbial community, functional gene pathways, and immune response. Our results indicate that  
 365 deadwood and plant litter are at least as crucial as plant richness for the ecosystem services provided  
 366 by green space.

367 Several factors underscore the significance of rewilding as a health-enhancing ecosystem service in  
 368 our study. First, the difference between the two treatments in diversity and richness of skin  
 369 proteobacterial classes were observed, even though gardening was practiced with similar frequency,  
 370 and time spent at the yards decreased in autumn in both groups. Second, since we specifically selected  
 371 plant cultivars hosting rich bacterial, and particularly gammaproteobacterial community, these

372 cultivars might have contributed to the observed difference. The same applies to gardening advice  
373 provided by our team; the rewilding group left plant litter to decompose naturally, which increases  
374 soil microbial diversity and resilience, and enhances nutrient cycle *on site*.<sup>51,52</sup> The use of logs and  
375 chips, and biodiverse planting soil were designed to increase the overall and Gammaproteobacterial  
376 exposure at the yards, and thus could contribute to the difference between the two study groups;  
377 Gammaproteobacteria have been linked to improved immune regulation and a reduced atopy  
378 risk.<sup>2,19,53</sup> In earlier intervention trials,<sup>19,53</sup> these bacterial classes have been associated with the higher  
379 frequency of T regulatory cells, which play a critical role in preventing autoimmunity.<sup>54</sup> Therefore,  
380 our finding indicates improved homeostasis and immunological self-tolerance.

381 Differences in the consequences of living habits also support the importance of rewilding. Only within  
382 the rewilding group picking of edible plants at the yard was associated with skin microbial diversity.  
383 In line with this, the frequency of nature visits increased skin gammaproteobacterial diversity within  
384 the control group only. Since we added several elements that plausibly enhanced proteobacterial  
385 community on the skin, it is hard to distinguish the core reason for the differences in skin microbiota  
386 between intervention and control groups. Nevertheless, our findings underline the importance of the  
387 quality of urban green space. Additional research is evidently needed to reveal the relative importance  
388 of each element. Today, the viable solution provided by the current study is to optimize them all.

#### 389 **4.2.Neighborhood deadwood promotes health-associated skin bacteriome**

390 The hypothesis that decaying wood is an important factor modulating skin microbiota of urbanities  
391 is supported by our study. First, proteobacterial taxa on the skin were directly associated with the  
392 decaying deadwood in the living environment. Since decaying deadwood exists in boreal nature  
393 together with other decomposing plant matter, and a vivid moss layer, the finding highlights the  
394 importance of plant litter in general. Interestingly, the same bacterial taxa that we found abundantly  
395 on skin, i.e., Alpha- and Gammaproteobacteria and Burkholderiales, are rich in decaying wood.<sup>55-60</sup>

396 Among the most interesting findings of our study were the associations between gardening practice  
397 and land cover. While the coverage of unkept garden area and deadwood shaped skin microbial  
398 community to an opposite direction than a high coverage of manicured lawn, frequent raking and  
399 urban fabric, including asphalt, shaped salivary microbial community similarly (Appendix p 16). This  
400 indicates that the removal of autumn leaves and other plant litter modifies the commensal microbiome  
401 to the same direction as built-up urban area. In several earlier studies,<sup>2,27</sup> buildings and paved surface  
402 were associated with an increased risk of immune-mediated diseases. The current study thus provides  
403 an explanation how paving and removal of plant litter are connected to human and planetary health.

404

405 Even though previous studies pointed out the importance of vegetation for health-associated  
406 microbiota transferred indoors,<sup>61-63</sup> our study is the first to separate the roles of plant richness versus  
407 deadwood abundance. Deadwood and plant residues seem to play an equal or even more important  
408 role in the health-associated ecosystem services than live vegetation. Until now, vegetation indices  
409 were a major if not the sole indicator of biodiversity in studies that tested how biodiversity is related  
410 to immune-mediated diseases.<sup>21</sup> Our study opens a new avenue for research; studies focusing on the  
411 health-associated ecosystem services should investigate neighborhood deadwood and plant residues  
412 in parallel live vegetation.

413

### 414 **4.3. Changes in salivary microbiota, functional gene pathways and cytokines are in** 415 **accordance with the biodiversity hypothesis**

416 The shifts observed in the salivary microbiota, functional gene pathways and cytokines are  
417 encouraging in the context of the biodiversity hypothesis. Among intervention participants,  
418 Mycobacteriaceae abundance in saliva increased; soil-derived *Mycobacterium* reduced inflammation  
419 and enhanced stress-resilience in murine studies.<sup>64-66</sup> Because Mycobacteriaceae prevails in decaying

420 deadwood,<sup>67</sup> the increase in the rewilding group may be due to the deadwood logs and chips used in  
421 the rewilding coupled with microbially diverse soil for the planting boxes. In parallel with  
422 Mycobacteriaceae, the observed increase in *Leuconostoc* sp. in saliva among the intervention  
423 participants may have metabolic benefits, because this probiotic genus is well known for fermentative  
424 potential.<sup>68,69</sup>

425 The analysis of salivary gene pathways indicates immunomodulatory benefits of the intervention  
426 treatment. Since the degradation of L-histidine is interconnected with various metabolic pathways  
427 that are involved in the biosynthesis of essential amino acids,<sup>70</sup> the observed shifts in L-histidine  
428 degradation pathway in saliva may have implications for cellular function, neurotransmission,  
429 immune regulation, and overall physiological balance and well-being. Because L-histidine  
430 degradation pathway I degrades L-histidine to L-glutamate, and because L-glutamate is associated  
431 with chronic inflammation<sup>71,72</sup>, the decrease in this pathway should contribute to reduction of pro-  
432 inflammatory signals. A recent *in vitro study* suggested that L-histidine attenuates non-esterified fatty  
433 acids -induced inflammation by reducing Grb2-associated binder 2 expression, and eventually  
434 induces IL-6 expression.<sup>73</sup> In our study, the abundance of decaying deadwood diversified salivary  
435 gene pathways, which in turn decreased IL-6 levels in saliva. Higher pro-inflammatory salivary  
436 cytokine levels have been associated with immune-mediated diseases, periodontal and tumor  
437 diseases,<sup>74,75</sup> stress<sup>76,77</sup> and neuropsychiatric disorders.<sup>78</sup> Further support for the immunomodulatory  
438 role of rewilding comes from the observation that picking edible plants was associated with salivary  
439 cytokines in the rewilding group. In other words, the variables that enhanced skin microbial richness  
440 and diversity were also associated directly with salivary cytokines only among rewilding group. As  
441 a whole, microbiologically oriented rewilding may be beneficial to mental and physical health.

442

443



## 5. Conclusions

444

445 This study showed that urban rewilding induces immunomodulatory shifts in salivary microbiota,  
446 functional gene pathways and cytokine levels, and that decaying deadwood induces beneficial shifts  
447 on the skin microbiota at least as efficiently as plant richness. The importance of the biologically  
448 diverse living environment in immunomodulation underscores the need to apply a microbially  
449 oriented rewilding approach in urban green spaces. Future studies should use manually inventoried  
450 and satellite-data-based deadwood/plant litter indices in parallel with vegetation indices when  
451 estimating the associations between biodiversity and immune-mediated diseases. Our findings  
452 provide an incentive for future urban rewilding approaches with microbially enriched organic soil,  
453 plants, and decaying deadwood for planetary health.

## 1. Acknowledgements

454

455 We thank all BIWE team members and molecular laboratory personnel Katri Leino and Tuija  
456 Hytönen, and specialist Leena Vuorinen at Natural Resources Institute Finland, and trainee Hibak  
457 Weiss at Tampere University. A special thank-you are owed to the study participants for their  
458 participation in this study. The authors wish to acknowledge CSC – IT Center for Science, Finland,  
459 for computational resources, and FIMM Genomics NGS Sequencing unit at University of Helsinki  
460 supported by HiLIFE and Biocenter Finland.

461 **Funding:** This work was supported by Research Council of Finland, Strategic Research Council  
462 funding (grant numbers 346136 to A.S., 346137 to J.R. and 346138 to O.H.L.).

463

464 .

465 **Author contributions:** A.S., M.I.R., R.P., L.U., A.O., L.K., J.R., O.H.L. designed study; M.I.R.,  
466 L.U., A.O., A.L., E.H., A.S., J.R. and O.H.L. implemented study; M.I.R., A.O., L.K., A.L., D.C.,



467 A.K., R.P., and E.H. generated data; M.I.R. and A.S. analyzed data; M.I.R. wrote first draft of the  
468 manuscript and prepared the figures and tables; All the authors reviewed the manuscript; H.H. was  
469 the medical monitor; A.S. was the principal investigators of the project.

470 **Competing interest:** A.S. and O.H.L. are co-inventors in a patent ‘Probiotic immunomodulatory  
471 compositions’ (U.S. patent no. 11318173, U.S. Patent and Trademark Office). A.S. and O.H.L are  
472 shareholders and members of the board of Uute scientific Ltd which develops immunomodulatory  
473 treatments.

474 **Data availability:** Skin bacterial sequence data were accessioned into the Sequence Read Archive  
475 (BioProject ID: PRJNA1102262). All other data needed to support the conclusions of this manuscript  
476 are included in the main text and supplementary appendix.

477 The sensitive data that support the findings of this study are available from Natural Resources Institute  
478 Finland, but restrictions defined in General Data Protection Regulation (EU 2016/679) and Finnish  
479 Data Protection Act 1050/2018 apply to the availability of these data, and so are not publicly  
480 available. Data are however available from the authors upon reasonable request and with permission  
481 from the ethical committee of the local hospital district (Helsinki and Uusimaa Hospital District,  
482 Finland).

## 483 **References**

- 484 1 Haahtela T, Alenius H, Lehtimäki J, *et al.* Immunological resilience and biodiversity for  
485 prevention of allergic diseases and asthma. *Allergy* 2021; **76**: 3613–26.
- 486 2 Hanski I, von Hertzen L, Fyhrquist N, *et al.* Environmental biodiversity, human microbiota, and  
487 allergy are interrelated. *Proc Natl Acad Sci USA* 2012; **109**: 8334–9.
- 488 3 Mills JG, Bissett A, Gellie NJC, *et al.* Revegetation of urban green space rewilds soil  
489 microbiotas with implications for human health and urban design. *Restor Ecol* 2020; **28**.  
490 DOI:10.1111/rec.13175.
- 491 4 Robinson JM, Aronson J, Daniels CB, *et al.* Ecosystem restoration is integral to humanity’s  
492 recovery from COVID-19. *The Lancet Planetary Health* 2022; **6**: e769–73.

- 493 5 Sinkkonen A. Distortion of the microbiota of the natural environment by human activities. In:  
494 Evolution, Biodiversity and a Reassessment of the Hygiene Hypothesis, Eds. Rook GAW, Lowry  
495 CA. Springer cham, ISBN: 978-3-030-91051-8, 2022: 222-242 DOI: 10.1007/978-3-030-91051-  
496 8\_8.
- 497 6 Perino A, Pereira HM, Navarro LM, *et al.* Rewilding complex ecosystems. *Science* 2019; **364**:  
498 eaav5570.
- 499 7 Fröhlich A, Ciach M. Dead tree branches in urban forests and private gardens are key habitat  
500 components for woodpeckers in a city matrix. *Landscape and Urban Planning* 2020; **202**:  
501 103869.
- 502 8 Home R, Lewis O, Bauer N, *et al.* Effects of garden management practices, by different types of  
503 gardeners, on human wellbeing and ecological and soil sustainability in Swiss cities. *Urban*  
504 *Ecosyst* 2019; **22**: 189–99.
- 505 9 Rook GAW. Evolution and the critical role of the microbiota in the reduced mental and physical  
506 health associated with low socioeconomic status (SES). *Neuroscience & Biobehavioral Reviews*  
507 2024; **161**: 105653.
- 508 10 Grönroos M, Parajuli A, Laitinen OH, *et al.* Short-term direct contact with soil and plant  
509 materials leads to an immediate increase in diversity of skin microbiota. *MicrobiologyOpen*  
510 2019; **8**: e00645.
- 511 11 Hui N, Grönroos M, Roslund MI, *et al.* Diverse Environmental Microbiota as a Tool to Augment  
512 Biodiversity in Urban Landscaping Materials. *Front Microbiol* 2019; **10**: 536.
- 513 12 Roslund MI, Puhakka R, Nurminen N, *et al.* Long-term biodiversity intervention shapes health-  
514 associated commensal microbiota among urban day-care children. *Environment International*  
515 2021; **157**: 106811.
- 516 13 Roslund MI, Puhakka R, Grönroos M, *et al.* Biodiversity intervention enhances immune  
517 regulation and health-associated commensal microbiota among daycare children. *Sci Adv* 2020;  
518 **6**: eaba2578.
- 519 14 Ruokolainen L, Herten L, Fyhrquist N, *et al.* Green areas around homes reduce atopic  
520 sensitization in children. *Allergy* 2015; **70**: 195–202.
- 521 15 Saarenpää M, Roslund MI, Nurminen N, *et al.* Urban indoor gardening enhances immune  
522 regulation and diversifies skin microbiota — A placebo-controlled double-blinded intervention  
523 study. *Environment International* 2024; **187**: 108705.
- 524 16 Selway CA, Mills JG, Weinstein P, *et al.* Transfer of environmental microbes to the skin and  
525 respiratory tract of humans after urban green space exposure. *Environment International* 2020;  
526 **145**: 106084.
- 527 17 Roslund MI, Nurminen N, Oikarinen S, *et al.* Skin exposure to soil microbiota elicits changes in  
528 cell-mediated immunity to pneumococcal vaccine. *Sci Rep* 2024; **14**: 18573.
- 529 18 Grönroos M, Jumpponen A, Roslund MI, *et al.* Using patterns of shared taxa to infer bacterial  
530 dispersal in human living environment in urban and rural areas. *Appl Environ Microbiol* 2024; :  
531 e00903-24.

- 532 19 Roslund MI, Parajuli A, Hui N, *et al.* A Placebo-controlled double-blinded test of the  
533 biodiversity hypothesis of immune-mediated diseases: Environmental microbial diversity elicits  
534 changes in cytokines and increase in T regulatory cells in young children. *Ecotoxicology and*  
535 *Environmental Safety* 2022; **242**: 113900.
- 536 20 Aerts R, Honnay O, Van Nieuwenhuysse A. Biodiversity and human health: mechanisms and  
537 evidence of the positive health effects of diversity in nature and green spaces. *British Medical*  
538 *Bulletin* 2018; **127**: 5–22.
- 539 21 Paciência I, Sharma N, Hugg TT, *et al.* The Role of Biodiversity in the Development of Asthma  
540 and Allergic Sensitization: A State-of-the-Science Review. *Environ Health Perspect* 2024; **132**:  
541 066001.
- 542 22 Parajuli A, Hui N, Puhakka R, *et al.* Yard vegetation is associated with gut microbiota  
543 composition. *Science of The Total Environment* 2020; **713**: 136707.
- 544 23 Winnicki MH, Dunn RR, Winther-Jensen M, Jess T, Allin KH, Bruun HH. Does childhood  
545 exposure to biodiverse greenspace reduce the risk of developing asthma? *Science of The Total*  
546 *Environment* 2022; **850**: 157853.
- 547 24 Rook GAW, Lowry CA. Evolution, Biodiversity and a Reassessment of the Hygiene Hypothesis,  
548 1st edn. Springer Cham, 2022 <https://doi.org/10.1007/978-3-030-91051-8>.
- 549 25 Seibold S, Bässler C, Brandl R, *et al.* Experimental studies of dead-wood biodiversity — A  
550 review identifying global gaps in knowledge. *Biological Conservation* 2015; **191**: 139–49.
- 551 26 Stokland JN, Siitonen J, Jonsson BG. Biodiversity in Dead Wood. Cambridge University Press,  
552 2012 <https://doi.org/10.1017/CBO9781139025843>.
- 553 27 Nurminen N, Cerrone D, Lehtonen J, *et al.* Land Cover of Early-Life Environment Modulates the  
554 Risk of Type 1 Diabetes. *Diabetes Care* 2021; **44**: 1506–14.
- 555 28 Halme P, Holec J, Heilmann-Clausen J. The history and future of fungi as biodiversity surrogates  
556 in forests. *Fungal Ecology* 2017; **27**: 193–201.
- 557 29 Lassauce A, Paillet Y, Jactel H, Bouget C. Deadwood as a surrogate for forest biodiversity:  
558 Meta-analysis of correlations between deadwood volume and species richness of saproxylic  
559 organisms. *Ecological Indicators* 2011; **11**: 1027–39.
- 560 30 Hao Z, Zhu Y, Fu Y, *et al.* Effects of Long-Term Enclosed Environment on Human Health  
561 Based on the Analysis of Salivary Microbiota and Cytokines. *Microbiol Spectr* 2022; **10**:  
562 e00254-22.
- 563 31 Hulett JM, Abshire DA, Armer JM, Millspaugh R, Millspaugh J. Rural-Urban Differences in  
564 Neuroimmune Biomarkers and Health Status Among Women Living With Breast Cancer.  
565 *Cancer Nurs* 2021; **44**: 323–32.
- 566 32 Riis JL, Out D, Dorn LD, *et al.* Salivary cytokines in healthy adolescent girls: Intercorrelations,  
567 stability, and associations with serum cytokines, age, and pubertal stage. *Developmental*  
568 *Psychobiology* 2014; **56**: 797–811.

- 569 33 Parajuli A, Grönroos M, Siter N, *et al.* Urbanization Reduces Transfer of Diverse Environmental  
570 Microbiota Indoors. *Front Microbiol* 2018; **9**: 84.
- 571 34 Turunen AW, Halonen J, Korpela K, *et al.* Cross-sectional associations of different types of  
572 nature exposure with psychotropic, antihypertensive and asthma medication. *Occup Environ Med*  
573 2023; **80**: 111–8.
- 574 35 Soininen L, Grönroos M, Roslund MI, Sinkkonen A. Long-term storage affects resource  
575 availability and occurrence of bacterial taxa linked to pollutant degradation and human health in  
576 landscaping materials. *Urban Forestry & Urban Greening* 2021; **60**: 127065.
- 577 36 Soininen L, Roslund MI, Tahvonen O, Manninen J, Hui N, Sinkkonen A. Forestry- and  
578 agriculture-derived materials as potential bacterial supplements in immunomodulatory urban  
579 greening. *Urban Forestry & Urban Greening* 2024; **101**: 128492.
- 580 37 Hoffmann TC, Glasziou PP, Boutron I, *et al.* Better reporting of interventions: template for  
581 intervention description and replication (TIDieR) checklist and guide. *BMJ* 2014; **348**: g1687–  
582 g1687.
- 583 38 Caporaso JG, Lauber CL, Walters WA, *et al.* Ultra-high-throughput microbial community  
584 analysis on the Illumina HiSeq and MiSeq platforms. *ISME J* 2012; **6**: 1621–4.
- 585 39 Callahan BJ, McMurdie PJ, Rosen MJ, Han AW, Johnson AJA, Holmes SP. DADA2: High-  
586 resolution sample inference from Illumina amplicon data. *Nat Methods* 2016; **13**: 581–3.
- 587 40 Quast C, Pruesse E, Yilmaz P, *et al.* The SILVA ribosomal RNA gene database project:  
588 improved data processing and web-based tools. *Nucleic Acids Research* 2012; **41**: D590–6.
- 589 41 McKnight DT, Huerlimann R, Bower DS, Schwarzkopf L, Alford RA, Zenger KR. Methods for  
590 normalizing microbiome data: An ecological perspective. *Methods Ecol Evol* 2019; **10**: 389–400.
- 591 42 Wood DE, Lu J, Langmead B. Improved metagenomic analysis with Kraken 2. *Genome Biol*  
592 2019; **20**: 257.
- 593 43 Beghini F, McIver LJ, Blanco-Míguez A, *et al.* Integrating taxonomic, functional, and strain-  
594 level profiling of diverse microbial communities with bioBakery 3. *eLife* 2021; **10**: e65088.
- 595 44 CORINE Land Cover. Copernicus Land Monitoring Service. CORINE Land Cover. Available  
596 from <https://land.copernicus.eu/en/products/corine-land-cover>. 2022.  
597 <https://land.copernicus.eu/en/products/corine-land-cover>.
- 598 45 Renvall P. Community structure and dynamics of wood-rotting Basidiomycetes on decomposing  
599 conifer trunks in northern Finland. *Karstenia* 1995; **35**: 1–51.
- 600 46 R D core team. R: A Language and Environment for Statistical Computing. Vienna, Austria: R  
601 Foundation for Statistical Computing. 2018.
- 602 47 Oksanen J, Blanchet FG, Kindt R, *et al.* Package ‘vegan’: Community ecology package. 2019; :  
603 <http://vegan.r-forge.r-project.org/>.
- 604 48 Bates D, Mächler M, Bolker BM, Walker SC. Fitting linear mixed-effects models using lme4.  
605 *Journal of Statistical Software* 2015; **67**. DOI:10.18637/jss.v067.i01.

- 606 49 Anderson MJ. Permutational Multivariate Analysis of Variance (PERMANOVA). *Wiley*  
607 *StatsRef: Statistics Reference Online* 2017; : 1–15.
- 608 50 Kherad-Pajouh S, Renaud O. A general permutation approach for analyzing repeated measures  
609 ANOVA and mixed-model designs. *Stat Papers* 2015; **56**: 947–67.
- 610 51 De Corato U. Disease-suppressive compost enhances natural soil suppressiveness against soil-  
611 borne plant pathogens: A critical review. *Rhizosphere* 2020; **13**: 100192.
- 612 52 Pengthamkeerati P, Motavalli PP, Kremer RJ. Soil microbial activity and functional diversity  
613 changed by compaction, poultry litter and cropping in a claypan soil. *Applied Soil Ecology* 2011;  
614 **48**: 71–80.
- 615 53 Roslund MI, Puhakka R, Grönroos M, *et al.* Biodiversity intervention enhances immune  
616 regulation and health-associated commensal microbiota among daycare children. *Science*  
617 *advances* 2020; **6**. DOI:10.1126/sciadv.aba2578.
- 618 54 Vignali DAA, Collison LW, Workman CJ. How regulatory T cells work. *Nat Rev Immunol* 2008;  
619 **8**: 523–32.
- 620 55 Gómez-Brandón M, Probst M, Siles JA, *et al.* Fungal communities and their association with  
621 nitrogen-fixing bacteria affect early decomposition of Norway spruce deadwood. *Sci Rep* 2020;  
622 **10**: 8025.
- 623 56 Kielak AM, Scheublin TR, Mendes LW, Van Veen JA, Kuramae EE. Bacterial Community  
624 Succession in Pine-Wood Decomposition. *Front Microbiol* 2016; **7**.  
625 DOI:10.3389/fmicb.2016.00231.
- 626 57 Moll J, Heintz-Buschart A, Bäessler C, *et al.* Amplicon Sequencing-Based Bipartite Network  
627 Analysis Confirms a High Degree of Specialization and Modularity for Fungi and Prokaryotes in  
628 Deadwood. *mSphere* 2021; **6**: e00856-20.
- 629 58 Rinta-Kanto JM, Sinkko H, Rajala T, *et al.* Natural decay process affects the abundance and  
630 community structure of Bacteria and Archaea in *Picea abies* logs. *FEMS Microbiology Ecology*  
631 2016; **92**: fiw087.
- 632 59 Sun H, Terhonen E, Kasanen R, Asiegbu FO. Diversity and Community Structure of Primary  
633 Wood-Inhabiting Bacteria in Boreal Forest. *Geomicrobiology Journal* 2014; **31**: 315–24.
- 634 60 Tláškal V, Baldrian P. Deadwood-Inhabiting Bacteria Show Adaptations to Changing Carbon  
635 and Nitrogen Availability During Decomposition. *Front Microbiol* 2021; **12**: 685303.
- 636 61 Hui N, Parajuli A, Puhakka R, *et al.* Temporal variation in indoor transfer of dirt-associated  
637 environmental bacteria in agricultural and urban areas. *Environment International* 2019; **132**:  
638 105069.
- 639 62 Zhao C, Liu X, Tan H, *et al.* Neighborhood garden's age shapes phyllosphere microbiota  
640 associated with respiratory diseases in cold seasons. *Environmental Science and Ecotechnology*  
641 2024; **18**: 100315.



- 642 63 Zhao C, Liu X, Tan H, *et al.* Urbanization influences the indoor transfer of airborne antibiotic  
643 resistance genes, which has a seasonally dependent pattern. *Environment International* 2024;  
644 **185**: 108545.
- 645 64 Foxx CL, Heinze JD, González A, *et al.* Effects of Immunization With the Soil-Derived  
646 Bacterium *Mycobacterium vaccae* on Stress Coping Behaviors and Cognitive Performance in a  
647 “Two Hit” Stressor Model. *Front Physiol* 2021; **11**: 524833.
- 648 65 Reber SO, Siebler PH, Donner NC, *et al.* Immunization with a heat-killed preparation of the  
649 environmental bacterium *Mycobacterium vaccae* promotes stress resilience in mice. *Proc Natl*  
650 *Acad Sci USA* 2016; **113**. DOI:10.1073/pnas.1600324113.
- 651 66 Smith DG, Martinelli R, Besra GS, *et al.* Identification and characterization of a novel anti-  
652 inflammatory lipid isolated from *Mycobacterium vaccae*, a soil-derived bacterium with  
653 immunoregulatory and stress resilience properties. *Psychopharmacology* 2019; **236**: 1653–70.
- 654 67 Tláškal V, Zrůstová P, Vrška T, Baldrian P. Bacteria associated with decomposing dead wood in  
655 a natural temperate forest. *FEMS Microbiology Ecology* 2017; **93**. DOI:10.1093/femsec/fix157.
- 656 68 Hemme D, Foucaud-Scheunemann C. Leuconostoc, characteristics, use in dairy technology and  
657 prospects in functional foods. *International Dairy Journal* 2004; **14**: 467–94.
- 658 69 Miyamoto H, Seta M, Horiuchi S, *et al.* Potential probiotic thermophiles isolated from mice after  
659 compost ingestion. *J Appl Microbiol* 2013; **114**: 1147–57.
- 660 70 Brosnan ME, Brosnan JT. Histidine Metabolism and Function. *The Journal of Nutrition* 2020;  
661 **150**: 2570S-2575S.
- 662 71 Okada M, Fukuyama K, Shiroyama T, Ueda Y. Carbamazepine Attenuates Astroglial L-  
663 Glutamate Release Induced by Pro-Inflammatory Cytokines via Chronically Activation of  
664 Adenosine A2A Receptor. *IJMS* 2019; **20**: 3727.
- 665 72 Takaki J, Fujimori K, Miura M, Suzuki T, Sekino Y, Sato K. L-glutamate released from  
666 activated microglia downregulates astrocytic L-glutamate transporter expression in  
667 neuroinflammation: the ‘collusion’ hypothesis for increased extracellular L-glutamate  
668 concentration in neuroinflammation. *J Neuroinflammation* 2012; **9**: 275.
- 669 73 Li M, Wang H, Ren H, *et al.* L-Histidine attenuates NEFA-induced inflammatory responses by  
670 suppressing Gab2 expression. *Life Sciences* 2024; **350**: 122672.
- 671 74 Nijakowski K, Surdacka A. Salivary Biomarkers for Diagnosis of Inflammatory Bowel Diseases:  
672 A Systematic Review. *IJMS* 2020; **21**: 7477.
- 673 75 Rathnayake N, Åkerman S, Klinge B, *et al.* Salivary Biomarkers for Detection of Systemic  
674 Diseases. *PLoS ONE* 2013; **8**: e61356.
- 675 76 Lengacher CA, Reich RR, Paterson CL, *et al.* A Large Randomized Trial: Effects of  
676 Mindfulness-Based Stress Reduction (MBSR) for Breast Cancer (BC) Survivors on Salivary  
677 Cortisol and IL-6. *Biological Research For Nursing* 2019; **21**: 39–49.
- 678 77 Szabo YZ, Newton TL, Miller JJ, Lyle KB, Fernandez-Botran R. Acute stress induces increases  
679 in salivary IL-10 levels. *Stress* 2016; **19**: 499–505.

680 78 Farah R, Haraty H, Salame Z, Fares Y, Ojcius DM, Said Sadier N. Salivary biomarkers for the  
681 diagnosis and monitoring of neurological diseases. *Biomedical Journal* 2018; **41**: 63–87.

682
